# Supplementary material for: Phenolic Compounds Reduce the Fat Content in Caenorhabditis elegans by Affecting Lipogenesis, Lipolysis, and Different Stress Responses
Source: PubMed Central journal article supplement (PMC7693530; doi:10.3390/ph13110355), 2020-10-30
Supplement: pharmaceuticals-13-00355-s001.pdf [file pharmaceuticals-13-00355-s001.pdf]

Supporting figures

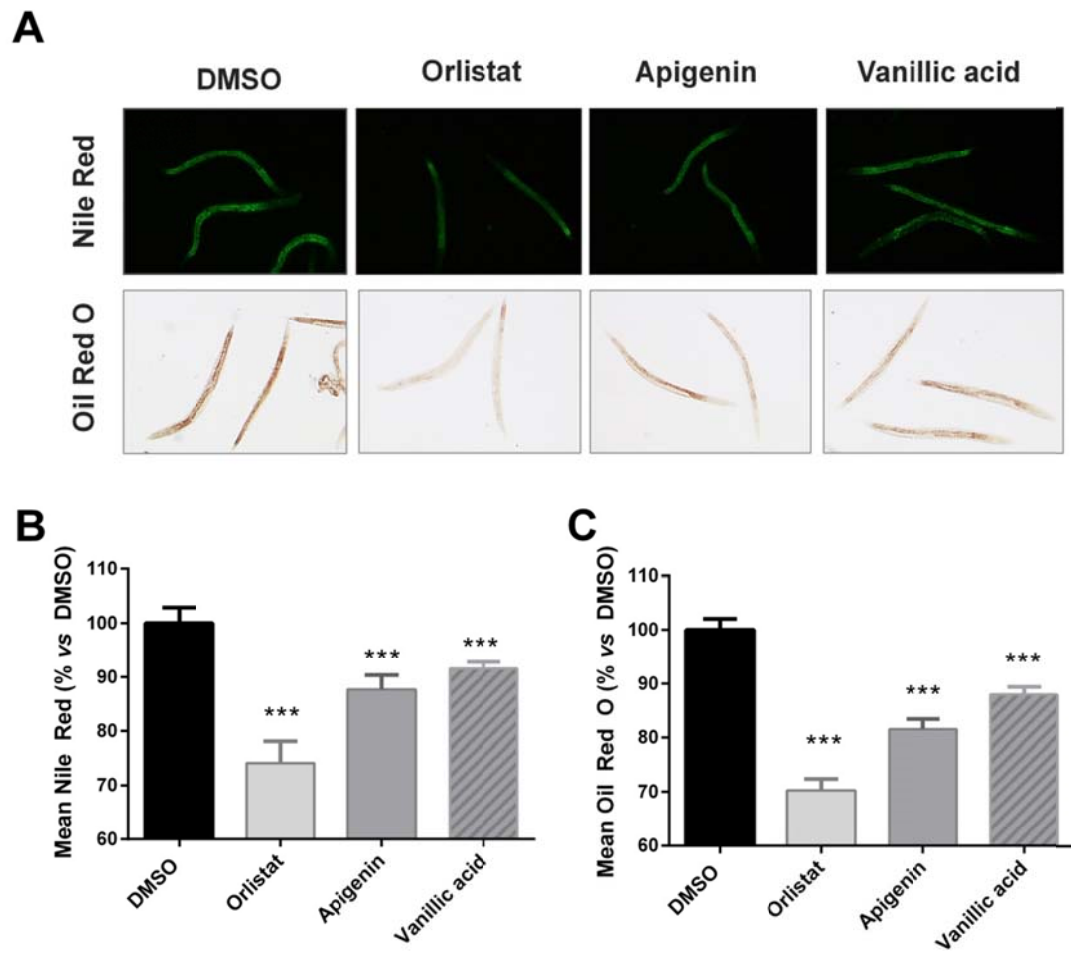

Figure S1. A) Nile Red and Oil Red O staining of DMSO, orlistat (6 $\mu$ g/mL, used as positive control), apigenin and vanillic acid (100  $\mu$ M)-treated worms. B) Nile Red quantifications of DMSO and treated worms. C) Oil Red O quantifications of DMSO and treated worms. The results are expressed as the mean  $\pm$  SD relative to DMSO-treated worms. Significance refers to the effect of the different treatments in comparison with DMSO-control worms (ANOVA followed by LSD test, \*\*\*  $p < 0.001$ ).

## Supplementary Tables

Table S1. Gene expression probes used for qPCR \*.

| <i>C. elegans</i> gene | Fw sequence               | Rv sequence             | Probe sequence                                     |
|------------------------|---------------------------|-------------------------|----------------------------------------------------|
| <i>fat-7</i>           | ACAAGTTAAGGAGCATGGAGG     | TCTCCTCCAGAAATAACGGG    | /56-FAM/CAGAGAAAG/Zen/CACTATTTCCCACTGGTCA/3IABkFQ/ |
| <i>gpx-3</i>           | TATGAACGGGCTTACCTATGTG    | CAACAGTTTGTGGGCAAGAC    | /56-FAM/CTCGTAAAG/Zen/TGGGTGATGATTGTCTCCG/3IABkFQ/ |
| <i>F49E12.10</i>       | TTTGTATGGCTATGGATGAAATTGG | TGCGTGTTCAAGTGGATGAG    | /56-FAM/ATGCTGGAA/Zen/ATCGAAACTGGTGCG/3IABkFQ/     |
| <i>acdh-1</i>          | ATCCGAGCTTCATCCAATTG      | CAGTCCAATCATTGTGCTCC    | /56-FAM/AGCCTTTTC/Zen/CATACTCTCCCAGAATTGC/3IABkFQ/ |
| <i>F25E2.3</i>         | AGATACTGAGCCAATGTCGATG    | CCGTTTCTGATATGAGGTCGTAC | /56-FAM/ATCACCGTC/Zen/TCCATCAGTGCCTC/3IABkFQ/      |
| <i>F56A4.3</i>         | AAGAGATTGTGCAGACTGGAG     | CAGAGCTTCTATCAGGCATCC   | /56-FAM/TGCGTCATT/Zen/TGGGAAGAGTTCATGGA/3IABkFQ/   |
| <i>F09C8.1</i>         | TTCTAATGTCTTGTACCTCCG     | TCAAGCTGATCATGGCACTAG   | /56-FAM/CGAGGATCC/Zen/GGTAGCAGTCTTCT/3IABkFQ/      |
| <i>acdh-2</i>          | TGAGCTAACCCGACCATTG       | CAGGAACCATTGCTCAAGTG    | /56-FAM/ACGCTATTG/Zen/AAGTTCTGAATGCCAGTCG/3IABkFQ/ |
| <i>c17c3.1</i>         | AAGAGCATCGAAGAGCAGAAG     | TTTTGGATGAGAGCAGGAGG    | /56-FAM/TCCACAGAT/Zen/GGCTGATCGCTTACAAC/3IABkFQ/   |
| <i>gpx-5</i>           | GCGTACACCCAGCAATACA       | TCAGCTGGCTCTTGCAAATA    | /56-FAM/CCAAGGAT/Zen/TTACTCTCATTGCCTTCCC/3IABkFQ/  |
| <i>gpdh-1</i>          | TTAGGGTGACAACGGATTATGAG   | CAGACGGATGATAGCGGATTT   | /56-FAM/TGGAGCTTT/Zen/GCGGAGCACTAAAGA/3IABkFQ/     |
| <i>cyp-37b1</i>        | GGCTGAAGCCTTTATGGTACT     | GGAAGCTTCCCATTTCTCCTT   | /56-FAM/CCCGGCCAT/Zen/GAGTATGACAGACAT/3IABkFQ/     |
| <i>f44e5.5</i>         | GCAGCTCGTAATCCAGAGAAT     | CTCCAAATGGCCAATGCTTAC   | /56-FAM/TGGACGACG/Zen/TTTCGATGAATCAACAGT/3IABkFQ/  |
| <i>lip-5</i>           | CTCTGCGACAACGTCCTATT      | CATGAGTAGCGTAGACTGGAAC  | /56-FAM/AGTGACCAA/Zen/TGGAACCAGACACGT/3IABkFQ/     |
| <i>ncx-8</i>           | CCTGGGAATCTACGCAGTTTAT    | TCACTTCCAGCTGCTTCTT     | /56-FAM/CCGTACTCG/Zen/GCGGAAGAACTTGAAA/3IABkFQ/    |
| <i>cyp13a6</i>         | GAAGTAGCTGTACAGGCAAGAA    | GAAGCTGGGCATCAAGGAATA   | /56-FAM/AAAGGAGTT/Zen/GAGCCAGGAGAACCT/3IABkFQ/     |

\* The expression level of each gene was normalized comparing to the expression of the *pmp3* (Ce02485188\_m1) and *tba1* (Ce02412618\_gH) genes from *Life Technologies* (TaqMan Gene Expression Assays), as housekeeping gene controls.

Table S2. Differentially expressed genes after treatment with resveratrol (200  $\mu$ M) vs DMSO-control worms (ANOVA  $p < 0.05$ ;  $-2 \leq FC \leq 2$ ). Results obtained in Transcriptomic Array Console (TAC, Affymetrix).

| Transcript Cluster ID | FC (RSV) | ANOVA p-value | Gene Symbol  | Description                      |
|-----------------------|----------|---------------|--------------|----------------------------------|
| 18484714              | -13.27   | 0.0007        | F49E12.10    | Protein F49E12.10                |
| 18598738              | -4.55    | 0.0025        | lys-2        | Protein LYS-2                    |
| 18632007              | -4.38    | 0.0045        | pgp-6        | Protein PGP-6                    |
| 18484756              | -4.16    | 0.0054        | F49E12.9     | Protein F49E12.9                 |
| 18453349              | -3.90    | 0.0010        | acdh-1       | Protein ACDH-1                   |
| 18570161              | -3.67    | 0.0068        | CELE_F44G3.2 | Protein F44G3.2                  |
| 18597749              | -3.64    | 0.0035        | CELE_W03F9.4 | Protein W03F9.4                  |
| 18564293              | -3.58    | 0.0051        | C33G8.2      | Protein C33G8.2                  |
| 18615561              | -3.56    | 0.0333        | col-169      | Protein COL-169                  |
| 18567605              | -3.21    | 0.0162        | CELE_F20G2.5 | Protein F20G2.5                  |
| 18520934              | -3.21    | 0.0249        | C06E8.5      | Protein C06E8.5                  |
| 18609505              | -3.06    | 0.0017        | abu-10       | Protein ABU-10                   |
| 18480145              | -3.05    | 0.0143        | C30G12.2     | Protein C30G12.2                 |
| 18528133              | -3.03    | 0.0161        | T24C4.4      | Protein T24C4.4                  |
| 18484287              | -3.00    | 0.0367        | F44E5.5      | Protein F44E5.5; Protein F44E5.4 |
| 18589632              | -3.00    | 0.0142        | fol-2        | Protein FOLT-2                   |
| 18581627              | -2.99    | 0.0231        | abu-1        | Protein ABU-1                    |
| 18615564              | -2.98    | 0.0096        | col-170      | Protein COL-170                  |
| 18554228              | -2.97    | 0.0038        | CELE_K08D8.4 | Protein K08D8.4                  |
| 18614569              | -2.94    | 0.0121        | abu-9        | Protein PQN-57                   |
| 18597331              | -2.92    | 0.0404        | hsp-16.1     | Protein HSP-16.1                 |
| 18582396              | -2.91    | 0.0301        | abu-8        | Protein ABU-8                    |
| 18574052              | -2.90    | 0.0276        | hacd-1       | Protein HACD-1                   |
| 18587679              | -2.90    | 0.0401        | CELE_F19B2.5 | Protein F19B2.5                  |
| 18523094              | -2.90    | 0.0205        | col-91       | Protein COL-91                   |
| 18568946              | -2.87    | 0.0479        | F32D8.7      | Protein F32D8.7                  |
| 18473813              | -2.82    | 0.0043        | CELE_W01A8.6 | Protein W01A8.6                  |
| 18575832              | -2.77    | 0.0438        | col-157      | Protein COL-157                  |
| 18601944              | -2.74    | 0.0231        | ZK6.11       | Protein ZK6.11                   |
| 18615544              | -2.73    | 0.0100        | col-167      | Protein COL-167                  |
| 18548494              | -2.68    | 0.0349        | swt-3        | Protein SWT-3                    |
| 18550679              | -2.67    | 0.0229        | D2096.6      | Protein D2096.6                  |
| 18571247              | -2.66    | 0.0397        | F56A4.3      | Protein F56A4.3                  |
| 18520577              | -2.64    | 0.0161        | tsp-2        | Protein TSP-2                    |
| 18589884              | -2.58    | 0.0120        | F41E6.11     | Protein F41E6.11                 |
| 18526132              | -2.55    | 0.0111        | ugt-62       | Protein UGT-62                   |
| 18552629              | -2.54    | 0.0134        | grl-4        | Protein GRL-4                    |
| 18498866              | -2.53    | 0.0154        | gst-14       | Protein GST-14                   |
| 18574047              | -2.48    | 0.0438        | pqn-54       | Protein PQN-54                   |
| 18575197              | -2.47    | 0.0295        | col-146      | Protein COL-146                  |
| 18633021              | -2.47    | 0.0230        | Y102A11A.7   | Protein Y102A11A.7               |
| 18617379              | -2.46    | 0.0122        | Y70D2A.1     | Protein Y70D2A.1                 |
| 18576993              | -2.45    | 0.0296        | hsp-16.11    | Protein HSP-16.11                |
| 18466529              | -2.45    | 0.0333        | phat-2       | Protein PHAT-2                   |
| 18581646              | -2.45    | 0.0211        | col-149      | Protein COL-149                  |
| 18502392              | -2.45    | 0.0135        | abu-11       | Protein ABU-11                   |
| 18513698              | -2.44    | 0.0280        | tyr-2        | Protein TYR-2                    |
| 18556277              | -2.40    | 0.0046        | T14A8.2      | Protein T14A8.2                  |
| 18533906              | -2.40    | 0.0285        | C18H7.11     | Protein C18H7.11                 |
| 18621038              | -2.39    | 0.0137        | C34E7.4      | Protein C34E7.4                  |

|          |       |        |               |                            |
|----------|-------|--------|---------------|----------------------------|
| 18581691 | -2.39 | 0.0408 | col-150       | Protein COL-150            |
| 18603456 | -2.38 | 0.0063 | clc-1         | Protein CLC-1              |
| 18516242 | -2.36 | 0.0491 | col-88        | Protein COL-88             |
| 18525560 | -2.35 | 0.0124 | K04C2.5       | Protein K04C2.5            |
| 18557521 | -2.35 | 0.0406 | col-120       | Protein COL-120            |
| 18576356 | -2.33 | 0.0180 | T20D4.4       | Protein T20D4.4            |
| 18492312 | -2.33 | 0.0447 | mlt-7         | Protein MLT-7              |
| 18614621 | -2.30 | 0.0369 | R11.2         | Protein R11.2              |
| 18455073 | -2.29 | 0.0064 | sra-17        | Protein SRA-17             |
| 18595609 | -2.27 | 0.0126 | CELE_T06E4.8  | Protein T06E4.8            |
| 18593334 | -2.27 | 0.0098 | cpt-4         | Protein CPT-4              |
| 18590657 | -2.26 | 0.0361 | F48G7.8       | Protein F48G7.8            |
| 18589217 | -2.25 | 0.0082 | F35B12.4      | Protein F35B12.4 // piit-1 |
| 18611996 | -2.24 | 0.0154 | nas-38        | Protein NAS-38             |
| 18626291 | -2.23 | 0.0247 | mxl-3         | Protein MXL-3              |
| 18596111 | -2.23 | 0.0141 | pmp-5         | Protein PMP-5              |
| 18597632 | -2.22 | 0.0465 | CELE_W02F12.2 | Protein W02F12.2           |
| 18582416 | -2.22 | 0.0192 | abu-6         | Protein ABU-6              |
| 18572639 | -2.20 | 0.0041 | K06H6.1       | Protein K06H6.1            |
| 18567815 | -2.19 | 0.0020 | cth-1         | Protein CTH-1              |
| 18543282 | -2.18 | 0.0204 | abu-5         | Protein ABU-5              |
| 18528112 | -2.17 | 0.0392 | toh-1         | Protein TOH-1              |
| 18482914 | -2.17 | 0.0148 | F23F1.2       | Protein F23F1.2            |
| 18586880 | -2.15 | 0.0210 | fat-7         | Protein FAT-7              |
| 18520595 | -2.15 | 0.0377 | tsp-1         | Protein TSP-1              |
| 18603195 | -2.14 | 0.0147 | C06G1.1       | Protein C06G1.1            |
| 18581856 | -2.14 | 0.0302 | col-145       | Protein COL-145            |
| 18521602 | -2.13 | 0.0023 | CELE_C23G10.6 | Protein C23G10.6           |
| 18622471 | -2.12 | 0.0367 | gcsH-1        | Protein GCSH-1             |
| 18590783 | -2.11 | 0.0261 | oac-32        | Protein OAC-32             |
| 18603588 | -2.10 | 0.0186 | C11E4.1       | Protein C11E4.1            |
| 18465325 | -2.09 | 0.0090 | col-62        | Protein COL-62             |
| 18552963 | -2.09 | 0.0306 | col-133       | Protein COL-133            |
| 18454813 | -2.09 | 0.0187 | col-58        | Protein COL-58             |
| 18547290 | -2.08 | 0.0424 | ZK593.3       | Protein ZK593.3            |
| 18494406 | -2.08 | 0.0304 | acdh-2        | Protein ACDH-2             |
| 18568239 | -2.08 | 0.0451 | asns-1        | Protein ASNS-1             |
| 18505735 | -2.08 | 0.0482 | col-71        | Protein COL-71             |
| 18589579 | -2.08 | 0.0436 | F36H9.5       | Protein F36H9.5            |
| 18574697 | -2.07 | 0.0020 | ugt-53        | Protein UGT-53             |
| 18451679 | -2.07 | 0.0224 | C15C6.1       | Protein C15C6.1            |
| 18601975 | -2.06 | 0.0261 | Iron-2        | Protein LRON-2             |
| 18571942 | -2.06 | 0.0425 | unc-23        | Protein UNC-23             |
| 18536789 | -2.03 | 0.0052 | lys-10        | Protein LYS-10             |
| 18556853 | -2.03 | 0.0282 | pqn-74        | Protein PQN-74             |
| 18525231 | -2.03 | 0.0117 | H10E21.4      | Protein H10E21.4           |
| 18611252 | -2.01 | 0.0493 | aagr-4        | Protein AAGR-4             |
| 18503706 | -2.01 | 0.0289 | T23F4.3       | Protein T23F4.3            |
| 18452642 | 2.03  | 0.0122 | fipr-22       | Protein FIPR-22            |
| 18547230 | 2.04  | 0.0102 | CELE_ZK550.2  | Protein ZK550.2            |
| 18536036 | 2.04  | 0.0080 | tpa-1         | Protein TPRA-1             |
| 18629679 | 2.09  | 0.0058 | M60.7         | Protein M60.7              |
| 18494751 | 2.10  | 0.0131 | tre-5         | Protein TRE-5              |
| 18597214 | 2.11  | 0.0181 | CELE_T26H5.8  | Protein T26H5.8            |
| 18624593 | 2.16  | 0.0111 | F25E2.3       | Protein F25E2.3            |

|          |      |        |               |                          |
|----------|------|--------|---------------|--------------------------|
| 18537273 | 2.16 | 0.0302 | thn-2         | Protein THN-2            |
| 18501194 | 2.22 | 0.0327 | K09F6.5       | Protein K09F6.5          |
| 18568638 | 2.27 | 0.0294 | cyp-37B1      | Protein CYP-37B1         |
| 18561523 | 2.64 | 0.0010 | nlp-29        | Protein NLP-29           |
| 18589254 | 2.91 | 0.0182 | CELE_F35E12.5 | Protein F35E12.5 //irg-5 |
| 18595142 | 2.92 | 0.0000 | CELE_T03E6.8  | Protein T03E6.8          |
| 18558751 | 3.01 | 0.0064 | CELE_Y51H4A.5 | Protein Y51H4A.5         |
| 18623122 | 3.16 | 0.0050 | F09C8.1       | Protein F09C8.1          |
| 18567774 | 3.33 | 0.0010 | CELE_F21F8.4  | Protein F21F8.4          |
| 18555883 | 3.96 | 0.0020 | CELE_T07G12.5 | Protein T07G12.5         |

Table S3. Main GO processes and KEGG signalling pathways affected by resveratrol (200  $\mu$ M) treatment. Analysis obtained from EGAN UCSF software.

| Gene Ontology Process | Process Name                                         | Enrichment | KEGG | Pathway Name                                | Enrichment |
|-----------------------|------------------------------------------------------|------------|------|---------------------------------------------|------------|
| GO:0006950            | response to stress                                   | 5.45E-11   | 100  | Steroid biosynthesis                        | 0.0120     |
| GO:0030968            | endoplasmic reticulum unfolded protein response      | 1.12E-09   | 590  | Arachidonic acid metabolism                 | 0.0700     |
| GO:0034620            | cellular response to unfolded protein                | 2.66E-09   | 62   | Fatty acid elongation in mitochondria       | 0.0756     |
| GO:0006986            | response to unfolded protein                         | 3.49E-09   | 1040 | Biosynthesis of unsaturated fatty acids     | 0.0922     |
| GO:0034976            | response to endoplasmic reticulum stress             | 3.49E-09   | 910  | Nitrogen metabolism                         | 0.1193     |
| GO:0035967            | cellular response to topologically incorrect protein | 3.97E-09   | 500  | Starch and sucrose metabolism               | 0.1456     |
| GO:0006952            | defense response                                     | 3.97E-09   | 650  | Butanoate metabolism                        | 0.1610     |
| GO:0035966            | response to topologically incorrect protein          | 1.31E-08   | 4141 | Protein processing in endoplasmic reticulum | 0.1655     |
| GO:0050896            | response to stimulus                                 | 2.60E-07   | 250  | Alanine, aspartate and glutamate            | 0.1761     |
| GO:0071310            | cellular response to organic substance               | 8.33E-07   | 510  | N-Glycan biosynthesis                       | 0.1810     |
| GO:0045087            | innate immune response                               | 1.97E-06   | 330  | Arginine and proline metabolism             | 0.1958     |
| GO:0006955            | immune response                                      | 2.15E-06   | 310  | Lysine degradation                          | 0.1958     |
| GO:0070887            | cellular response to chemical stimulus               | 2.20E-06   | 480  | Glutathione metabolism                      | 0.2055     |
| GO:0002376            | immune system process                                | 2.24E-06   | 380  | Tryptophan metabolism                       | 0.2103     |
| GO:0010033            | response to organic substance                        | 4.25E-06   | 280  | Valine, leucine and isoleucine degradation  | 0.2431     |
| GO:0009617            | response to bacterium                                | 1.73E-05   | 71   | Fatty acid metabolism                       | 0.2876     |
| GO:0042742            | defense response to bacterium                        | 1.73E-05   | 4010 | MAPK signaling pathway                      | 0.3172     |
| GO:0033554            | cellular response to stress                          | 1.22E-04   | 1100 | Metabolic pathways                          | 0.5688     |
| GO:0006633            | fatty acid biosynthetic process                      | 0.0587     |      |                                             |            |
| GO:0072330            | monocarboxylic acid biosynthetic process             | 0.0701     |      |                                             |            |
| GO:1901136            | carbohydrate derivative catabolic process            | 0.0812     |      |                                             |            |
| GO:0046394            | carboxylic acid biosynthetic process                 | 0.0977     |      |                                             |            |

Table S4. Differentially expressed genes after apigenin (100  $\mu$ M) treatment vs DMSO-control worms (ANOVA  $p < 0.05$ ;  $-1.5 \leq FC \leq 1.5$ ). Results obtained in Transcriptomic array console (TAC, Affymetrix).

| Transcript Cluster ID | FC (APIG vs. CNT) | ANOVA p-value (APIG vs. CNT) | Gene Symbol     | Description        |
|-----------------------|-------------------|------------------------------|-----------------|--------------------|
| 18548347              | -3.12             | 0.004376                     | lact-6          | Protein LACT-6     |
| 18497698              | -2                | 0.035086                     | F16G10.11       | Protein F16G10.11  |
| 18542887              | -1.97             | 0.006494                     | CELE_W02A2.9    | Protein W02A2.9    |
| 18464574              | -1.97             | 0.011399                     | B0205.13        | Protein B0205.13   |
| 18582764              | -1.94             | 0.019364                     | cyp-35C1        | Protein CYP-35C1   |
| 18560391              | -1.91             | 0.025953                     | pqn-90          | Protein PQN-90     |
| 18592542              | -1.85             | 0.010530                     | CELE_K02H11.9   | Protein K02H11.9   |
| 18599548              | -1.84             | 0.000679                     | CELE_Y43F8B.14  | Protein Y43F8B.14  |
| 18487591              | -1.79             | 0.018389                     | CELE_T01B7.13   | Protein T01B7.13   |
| 18564936              | -1.77             | 0.003707                     | pqp-9           | Protein PGP-9      |
| 18490903              | -1.75             | 0.041863                     | Y51H7C.1        | Protein Y51H7C.1   |
| 18573619              | -1.74             | 0.021973                     | M03F8.1         | Protein M03F8.1    |
| 18553047              | -1.7              | 0.012934                     | CELE_F53B2.8    | Protein F53B2.8    |
| 18582377              | -1.69             | 0.019432                     | ugt-51          | Protein UGT-51     |
| 18583320              | -1.67             | 0.009720                     | ncx-8           | Protein NCX-8      |
| 18616126              | -1.67             | 0.010287                     | T22B7.3         | Protein T22B7.3    |
| 18503466              | -1.66             | 0.013107                     | fbxb-37         | Protein FBXB-37    |
| 18498855              | -1.65             | 0.007166                     | CELE_F36H5.9    | Protein F36H5.9    |
| 18568638              | -1.65             | 0.012400                     | cyp-37B1        | Protein CYP-37B1   |
| 18523225              | -1.64             | 0.014591                     | pqn-29          | Protein PQN-29     |
| 18592847              | -1.63             | 0.019143                     | K07B1.8         | Protein K07B1.8    |
| 18565064              | -1.62             | 0.022887                     | irg-2           | Protein IRG-2      |
| 18625316              | -1.61             | 0.016830                     | F38B2.6         | Protein F38B2.6    |
| 18628994              | -1.61             | 0.025156                     | cyp-14A2        | Protein CYP-14A2   |
| 18457037              | -1.6              | 0.003582                     | F56H6.1         | Protein F56H6.1    |
| 18567575              | -1.59             | 0.020037                     | srbc-27         | Protein SRBC-27    |
| 18584695              | -1.58             | 0.029665                     | dmd-11          | Protein DMD-11     |
| 18594198              | -1.56             | 0.000312                     | cyp-33C8        | Protein CYP-33C8   |
| 18609993              | -1.55             | 0.001214                     | F40E10.5        | Protein F40E10.5   |
| 18561846              | -1.55             | 0.013581                     | B0554.4         | Protein B0554.4    |
| 18461357              | -1.53             | 0.031891                     | CELE_Y18D10A.4  | Protein Y18D10A.4  |
| 18495412              | -1.53             | 0.048672                     | gba-2           | Protein GBA-2      |
| 18550503              | -1.51             | 0.040749                     | CELE_C53D6.6    | Protein C53D6.6    |
| 18545035              | -1.51             | 0.040928                     | Y54G2A.36       | Protein Y54G2A.36  |
| 18607346              | 1.5               | 0.006976                     | pcyt-1          | Protein PCYT-1     |
| 18574818              | 1.5               | 0.043886                     | T04C12.7        | Protein T04C12.7   |
| 18505097              | 1.53              | 0.001050                     | clcc-4          | Protein CLEC-4     |
| 18626238              | 1.53              | 0.004780                     | CELE_F46F2.3    | Protein F46F2.3    |
| 18600676              | 1.54              | 0.001062                     | CELE_Y69H2.1    | Protein Y69H2.1    |
| 18607658              | 1.54              | 0.031808                     | scav-4          | Protein SCAV-4     |
| 18496370              | 1.55              | 0.025311                     | D1022.3         | Protein D1022.3    |
| 18558646              | 1.55              | 0.029226                     | Y45F10D.2       | Protein Y45F10D.2  |
| 18626595              | 1.55              | 0.036069                     | F47B7.7         | Protein F47B7.7    |
| 18569779              | 1.56              | 0.010778                     | CELE_F41B5.12   | Protein F41B5.12   |
| 18559956              | 1.56              | 0.035711                     | CELE_Y69A2AR.27 | Protein Y69A2AR.27 |
| 18575442              | 1.57              | 0.006905                     | CELE_T08G3.7    | Protein T08G3.7    |
| 18574261              | 1.57              | 0.015710                     | pqn-60          | Protein PQN-60     |
| 18542406              | 1.57              | 0.038379                     | T22B11.4        | Protein T22B11.4   |

|          |      |          |               |                  |
|----------|------|----------|---------------|------------------|
| 18476129 | 1.58 | 0.003490 | Y51F10.7      | Protein Y51F10.7 |
| 18561999 | 1.59 | 0.006068 | CELE_C01G10.4 | Protein C01G10.4 |
| 18623200 | 1.62 | 0.014630 | F09F9.2       | Protein F09F9.2  |
| 18614294 | 1.64 | 0.007574 | scav-5        | Protein SCAV-5   |
| 18459624 | 1.65 | 0.003595 | T21G5.6       | Protein T21G5.6  |
| 18477914 | 1.66 | 0.035780 | B0228.1       | Protein B0228.1  |
| 18538726 | 1.66 | 0.044014 | noah-2        | Protein NOAH-2   |
| 18627064 | 1.67 | 0.010550 | wrt-2         | Protein WRT-2    |
| 18580352 | 1.69 | 0.001353 | glb-33        | Protein GLB-33   |
| 18583384 | 1.69 | 0.011406 | C13G3.1       | Protein C13G3.1  |
| 18544174 | 1.7  | 0.035356 | col-108       | Protein COL-108  |
| 18490177 | 1.71 | 0.034250 | nspe-7        | Protein NSPE-7   |
| 18561500 | 1.72 | 0.002612 | B0024.4       | Protein B0024.4  |
| 18603602 | 1.73 | 0.001004 | C11E4.2       | Protein C11E4.2  |
| 18588166 | 1.73 | 0.006119 | F22F7.8       | Protein F22F7.8  |
| 18581342 | 1.73 | 0.043085 | lipl-5        | Protein LIPL-5   |
| 18472317 | 1.74 | 0.012859 | R11A5.3       | Protein R11A5.3  |
| 18623467 | 1.86 | 0.031159 | F13C5.5       | Protein F13C5.5  |
| 18628595 | 1.97 | 0.008982 | aqp-8         | Protein AQP-8    |
| 18558503 | 2.13 | 0.029505 | CELE_Y43D4A.2 | Protein Y43D4A.2 |
| 18494494 | 2.25 | 0.023256 | CELE_C17F4.7  | Protein C17F4.7  |
| 18505045 | 2.4  | 0.019494 | nspe-1        | Protein NSPE-1   |
| 18503106 | 2.81 | 0.000542 | cyp-13A6      | Protein CYP-13A6 |



Table S5. Main GO processes and KEGG signalling pathways affected by apigenin (100  $\mu$ M) treatment. Analysis obtained from EGAN UCSF software.

| Gene Ontology Process | Process Name                                        | Enrichment | KEGG | Pathway Name                             | Enrichment |
|-----------------------|-----------------------------------------------------|------------|------|------------------------------------------|------------|
| GO:0009617            | Response to bacterium                               | 0.00066    | 4020 | Calcium signaling pathway                | 0.00797    |
| GO:0042742            | Defense response to bacterium                       | 0.00066    | 564  | Glycerophospholipid metabolism           | 0.01025    |
| GO:0098542            | Defense response to other organism                  | 0.00115    | 600  | Sphingolipid metabolism                  | 0.01931    |
| GO:0051707            | Response to other organism                          | 0.00118    | 100  | Steroid biosynthesis                     | 0.01946    |
| GO:0009607            | Response to biotic stimulus                         | 0.00118    | 980  | Metabolism of xenobiotics by cytochrome  | 0.03246    |
| GO:0043207            | Response to external biotic stimulus                | 0.00118    | 4142 | Lysosome                                 | 0.03717    |
| GO:0006952            | Defense response                                    | 0.00252    | 982  | Drug metabolism - cytochrome P450        | 0.03891    |
| GO:0050829            | Defense response to Gram-negative bacterium         | 0.00657    | 310  | Lysine degradation                       | 0.04819    |
| GO:0009605            | Response to external stimulus                       | 0.02484    | 480  | Glutathione metabolism                   | 0.05311    |
| GO:0006950            | Response to stress                                  | 0.03573    | 4320 | Dorso-ventral axis formation             | 0.10245    |
| GO:0051704            | Multi-organism process                              | 0.05546    | 71   | Fatty acid metabolism                    | 0.10398    |
| GO:0050830            | Defense response to Gram-positive bacterium         | 0.06091    | 590  | Arachidonic acid metabolism              | 0.11123    |
| GO:0018996            | Molting cycle, collagen and cuticulin-based cuticle | 0.07878    | 514  | Other types of O-glycan biosynthesis     | 0.12854    |
| GO:0042303            | Molting cycle                                       | 0.07878    | 511  | Other glycan degradation                 | 0.12854    |
| GO:0050896            | Response to stimulus                                | 0.16943    | 830  | Retinol metabolism                       | 0.13706    |
| GO:0045132            | Meiotic chromosome segregation                      | 0.24482    | 53   | Ascorbate and aldarate metabolism        | 0.14551    |
| GO:0019915            | Lipid storage                                       | 0.30035    | 860  | Porphyrin and chlorophyll metabolism     | 0.15387    |
| GO:0098813            | Nuclear chromosome segregation                      | 0.30199    | 40   | Pentose and glucuronate interconversions | 0.17846    |
| GO:0051235            | Maintenance of location                             | 0.30460    | 1100 | Metabolic pathways                       | 0.20077    |
| GO:0010876            | Lipid localization                                  | 0.30601    | 4080 | Neuroactive ligand-receptor interaction  | 0.21016    |
| GO:0007059            | Chromosome segregation                              | 0.31791    | 500  | Starch and sucrose metabolism            | 0.22554    |
| GO:0048477            | Oogenesis                                           | 0.34619    | 4070 | Phosphatidylinositol signaling system    | 0.24063    |
|                       |                                                     |            | 4012 | ErbB signaling pathway                   | 0.24807    |
|                       |                                                     |            | 983  | Drug metabolism - other enzymes          | 0.26994    |

Table S6. Differentially expressed genes after vanillic acid (100  $\mu$ M) treatment vs DMSO-control worms (ANOVA  $p < 0.05$ ;  $-1.5 \leq FC \leq 1.5$ ). Results obtained in Transcriptomic array console (TAC, Affymetrix).

| Transcript Cluster ID | FC (VAN vs. CNT) | ANOVA p-value (VAN vs. CNT) | Gene Symbol          | Description                          |
|-----------------------|------------------|-----------------------------|----------------------|--------------------------------------|
| 18478405              | 2.31             | 0.020037                    | nspb-9               | Protein NSPB-9                       |
| 18565542              | 2.29             | 0.016357                    | C54D10.9             | Protein C54D10.9                     |
| 18484287              | 2.04             | 0.034070                    | F44E5.5; F44E5.4     | Protein F44E5.5; Protein F44E5.4     |
| 18599811              | 1.98             | 0.011147                    | hsp-16.2             | Protein HSP-16.2                     |
| 18478418              | 1.94             | 0.046852                    | nspb-7               | Protein NSPB-7                       |
| 18516585              | 1.85             | 0.012236                    | fbxa-61              | Protein FBXA-61                      |
| 18603602              | 1.84             | 0.002737                    | C11E4.2              | Protein C11E4.2                      |
| 18601841              | 1.8              | 0.039633                    | CELE_ZK262.19        | Protein ZK262.19                     |
| 18602807              | 1.73             | 0.048613                    | nspc-7               | Protein NSPC-7                       |
| 18516830              | 1.71             | 0.009942                    | fmo-3                | Protein FMO-3                        |
| 18456088              | 1.7              | 0.012980                    | gpdh-1               | Protein GPDH-1                       |
| 18483501              | 1.7              | 0.025977                    | nspb-11              | Protein NSPB-11                      |
| 18583050              | 1.7              | 0.022649                    | str-130              | Protein STR-130                      |
| 18563830              | 1.69             | 0.027037                    | C25F9.9              | Protein C25F9.9                      |
| 18493317              | 1.67             | 0.021547                    | nspb-10              | Protein NSPB-10                      |
| 18539599              | 1.65             | 0.029163                    | nspb-6               | Protein NSPB-6                       |
| 18589217              | 1.63             | 0.041958                    | F35B12.4             | Protein F35B12.4                     |
| 18629289              | 1.62             | 0.044716                    | K10C2.14             | Protein K10C2.14                     |
| 18573963              | 1.61             | 0.043645                    | CELE_R08A2.7         | Protein R08A2.7                      |
| 18614327              | 1.59             | 0.032859                    | R07B1.9              | Protein R07B1.9                      |
| 18622500              | 1.59             | 0.047424                    | D1053.3              | Protein D1053.3                      |
| 18532772              | 1.56             | 0.046983                    | CELE_C01B10.44       | Protein C01B10.44                    |
| 18550546              | 1.55             | 0.001434                    | C54E4.4              | Protein C54E4.4                      |
| 18535549              | 1.54             | 0.021219                    | C49A9.9              | Protein C49A9.9                      |
| 18580352              | 1.54             | 0.022197                    | glb-33               | Protein GLB-33                       |
| 18610156              | 1.54             | 0.027160                    | cnc-8                | Protein CNC-8                        |
| 18544174              | 1.53             | 0.017068                    | col-108              | Protein COL-108                      |
| 18564629              | 1.53             | 0.039761                    | sru-27               | Protein SRU-27                       |
| 18589254              | 1.53             | 0.039303                    | CELE_F35E12.5        | Protein F35E12.5                     |
| 18485054              | 1.52             | 0.002675                    | aat-7                | Protein AAT-7                        |
| 18582648              | 1.52             | 0.007568                    | ugt-63               | Protein UGT-63                       |
| 18513858              | 1.51             | 0.017342                    | K10D2.7              | Protein K10D2.7                      |
| 18576999              | 1.51             | 0.010980                    | hsp-16.48; hsp-16.49 | Protein HSP-16.48; Protein HSP-16.49 |
| 18597334              | 1.51             | 0.010980                    | hsp-16.48; hsp-16.49 | Protein HSP-16.48; Protein HSP-16.49 |
| 18550503              | -1.5             | 0.018547                    | CELE_C53D6.6         | Protein C53D6.6                      |
| 18592291              | -1.5             | 0.048792                    | srbc-40              | Protein SRBC-40                      |
| 18578524              | -1.52            | 0.026553                    | CELE_Y37H2C.4        | Protein Y37H2C.4                     |
| 18606692              | -1.52            | 0.005479                    | C54G7.1              | Protein C54G7.1                      |
| 18602419              | -1.53            | 0.003016                    | B0416.2              | Protein B0416.2                      |

|          |       |          |               |                               |
|----------|-------|----------|---------------|-------------------------------|
| 18631683 | -1.53 | 0.020527 | dop-3         | Protein DOP-3                 |
| 18570288 | -1.54 | 0.023570 | sru-39        | Protein SRU-39                |
| 18564416 | -1.55 | 0.043030 | C35A11.3      | Protein C35A11.3              |
| 18592611 | -1.55 | 0.023098 | srh-118       | Protein SRH-118               |
| 18494801 | -1.57 | 0.020272 | CELE_C24H12.6 | Protein C24H12.6              |
| 18576386 | -1.58 | 0.038045 | T20D4.8       | Protein T20D4.8               |
| 18578207 | -1.6  | 0.030162 | CELE_Y17D7C.1 | Protein Y17D7C.1              |
| 18568638 | -1.63 | 0.017153 | cyp-37B1      | Protein CYP-37B1              |
| 18590701 | -1.63 | 0.014059 | CELE_F49H6.12 | Protein F49H6.12              |
| 18563387 | -1.67 | 0.035391 | C17B7.3       | Protein C17B7.3               |
| 18541006 | -1.72 | 0.047797 | M70.2         | Protein M70.2                 |
| 18522338 | -1.75 | 0.026676 | arl-6         | Protein ARL-6                 |
| 18630450 | -1.78 | 0.031722 | pqn-57; abu-9 | Protein PQN-57; Protein ABU-9 |
| 18458379 | -1.98 | 0.049408 | CELE_M01G12.5 | Protein M01G12.5              |
| 18562596 | -1.98 | 0.025431 | fbxa-157      | Protein FBXA-157              |

Table S7. Main GO processes and KEGG signalling pathways affected by vanillic acid (100  $\mu$ M) treatment. Analysis obtained from EGAN UCSF software.

| Gene Ontology Process | Process Name                                         | Enrichment | KEGG | Pathway Name                      | Enrichment |
|-----------------------|------------------------------------------------------|------------|------|-----------------------------------|------------|
| GO:0050830            | defense response to Gram-positive bacterium          | 0.03699    | 4122 | Sulfur relay system               | 0.01248    |
| GO:0030968            | endoplasmic reticulum unfolded protein response      | 0.05985    | 590  | Arachidonic acid metabolism       | 0.01360    |
| GO:0034620            | cellular response to unfolded protein                | 0.06628    | 982  | Drug metabolism - cytochrome P450 | 0.03589    |
| GO:0006986            | response to unfolded protein                         | 0.06842    | 480  | Glutathione metabolism            | 0.04248    |
| GO:0034976            | response to endoplasmic reticulum stress             | 0.06842    | 564  | Glycerophospholipid metabolism    | 0.05120    |
| GO:0035967            | cellular response to topologically incorrect protein | 0.06948    |      |                                   |            |
| GO:0035966            | response to topologically incorrect protein          | 0.08008    |      |                                   |            |
| GO:0009617            | response to bacterium                                | 0.09783    |      |                                   |            |
| GO:0042742            | defense response to bacterium                        | 0.09783    |      |                                   |            |
| GO:0098542            | defense response to other organism                   | 0.11728    |      |                                   |            |
| GO:0051707            | response to other organism                           | 0.11830    |      |                                   |            |
| GO:0009607            | response to biotic stimulus                          | 0.11830    |      |                                   |            |
| GO:0043207            | response to external biotic stimulus                 | 0.11830    |      |                                   |            |
| GO:0071310            | cellular response to organic substance               | 0.13236    |      |                                   |            |
| GO:0070887            | cellular response to chemical stimulus               | 0.14915    |      |                                   |            |
| GO:0010033            | response to organic substance                        | 0.16178    |      |                                   |            |
| GO:0006950            | response to stress                                   | 0.17301    |      |                                   |            |
| GO:0033554            | cellular response to stress                          | 0.24618    |      |                                   |            |
| GO:0006952            | defense response                                     | 0.29435    |      |                                   |            |
| GO:0009605            | response to external stimulus                        | 0.31772    |      |                                   |            |
| GO:0007165            | signal transduction                                  | 0.34949    |      |                                   |            |
| GO:0042221            | response to chemical                                 | 0.37623    |      |                                   |            |
| GO:0050896            | response to stimulus                                 | 0.37748    |      |                                   |            |
